# Supplementary material
Source: PubMed Central journal article supplement (PMC1360519)
Supplement: pnas_0505364103_1.pdf [file pnas_0505364103_1.pdf]

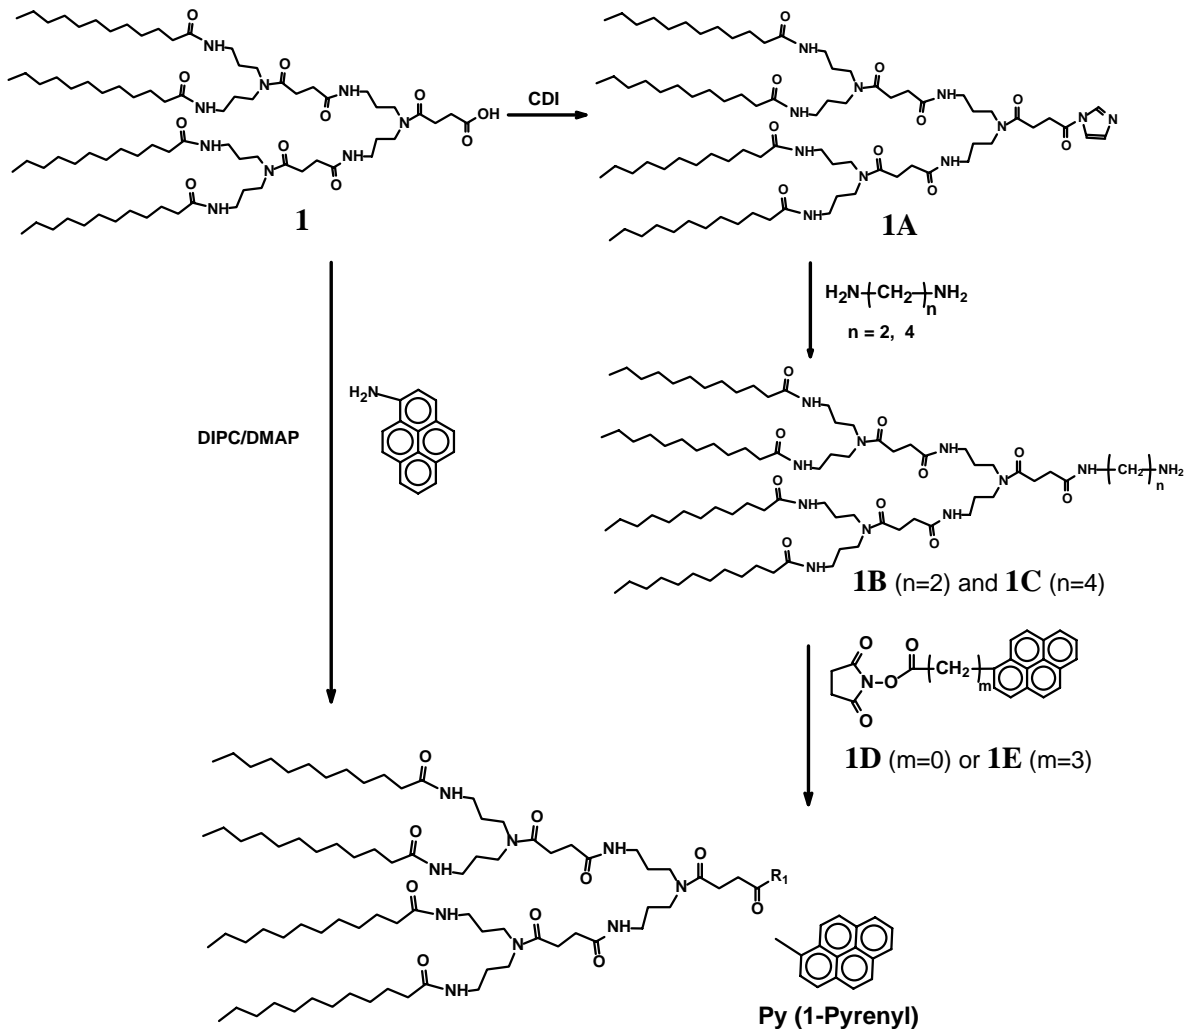

$\text{R}_1 = \text{NH}^1\text{Py} \quad : 2$

$\text{R}_1 = \text{NH}(\text{CH}_2)_2\text{NHCO}^1\text{Py} \quad : 3$

$\text{R}_1 = \text{NH}(\text{CH}_2)_4\text{NHCO}^1\text{Py} \quad : 4$

$\text{R}_1 = \text{NH}(\text{CH}_2)_4\text{NHCO}(\text{CH}_2)_3^1\text{Py} \quad : 5$
