# Supplementary material
Source: PubMed Central journal article supplement (PMC1360519)

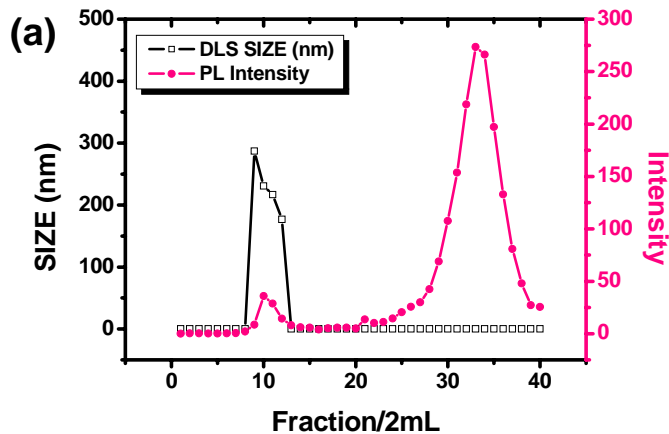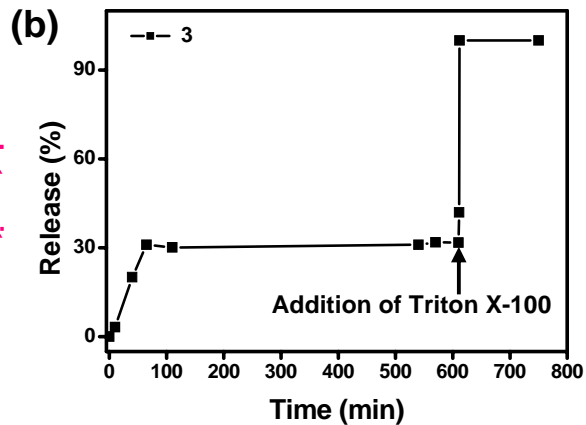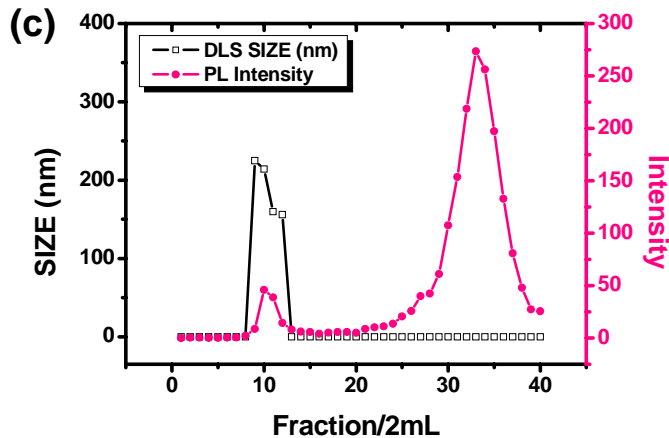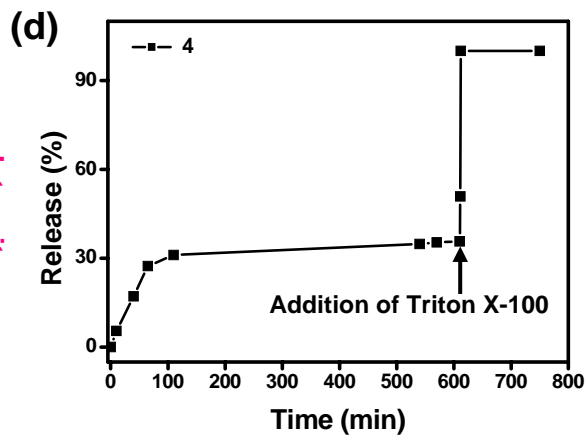

Supplement: pnas_0505364103_2.pdf [file pnas_0505364103_2.pdf]

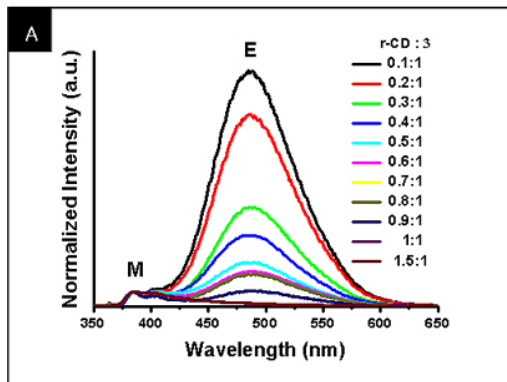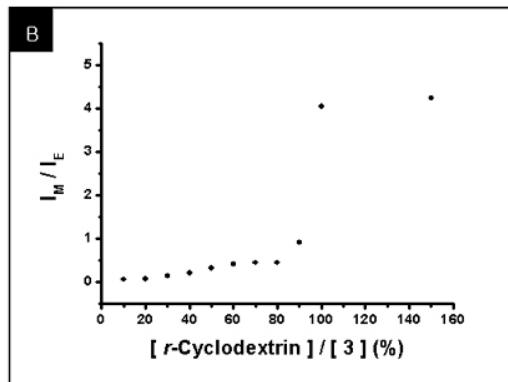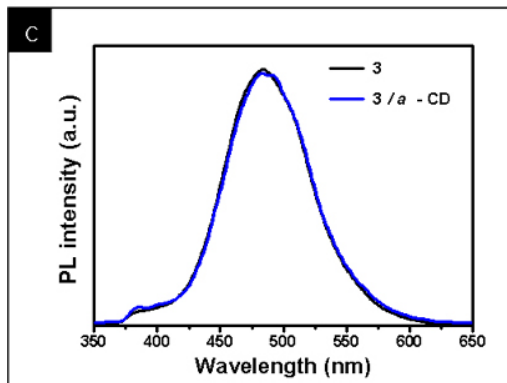

**D**

|                   | Mean diameter (nm) | PDI( $\mu_2/\Gamma^2$ ) |
|-------------------|--------------------|-------------------------|
| 3                 | 237                | 0.1184                  |
| 3 / $\alpha$ - CD | 238                | 0.2092                  |

Supplement: pnas_0505364103_3.pdf [file pnas_0505364103_3.pdf]

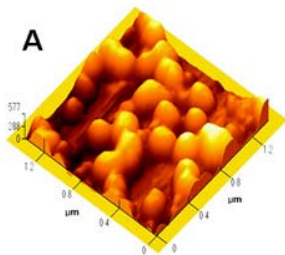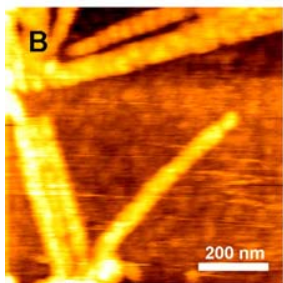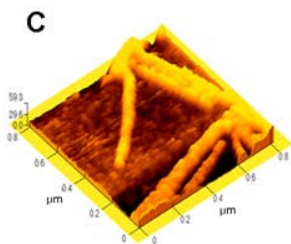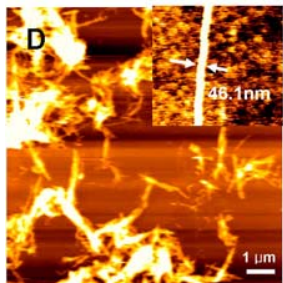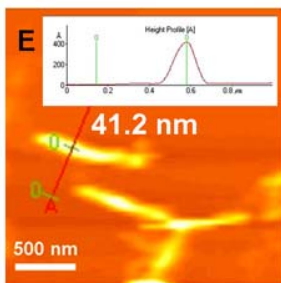

Supplement: pnas_0505364103_4.pdf [file pnas_0505364103_4.pdf]

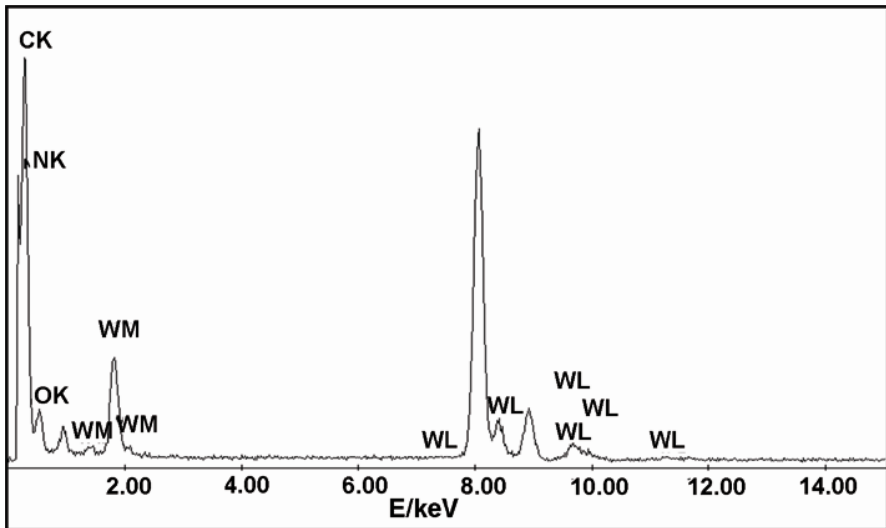

Supplement: pnas_0505364103_5.pdf [file pnas_0505364103_5.pdf]

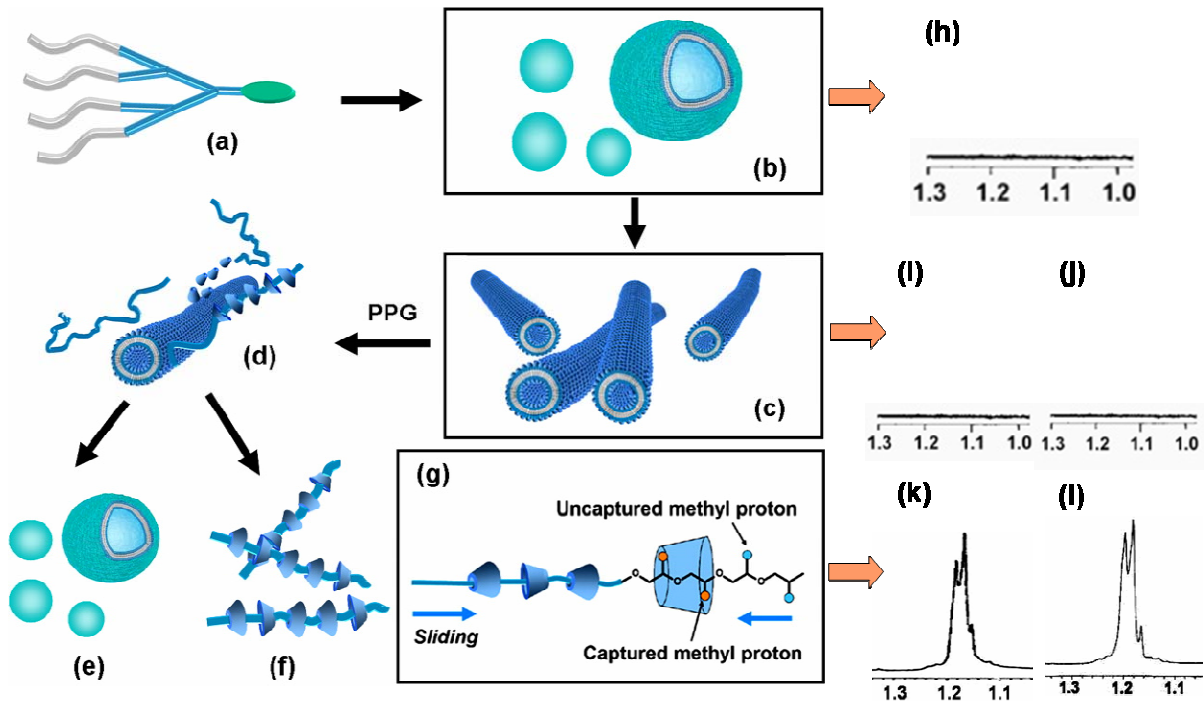

Supplement: pnas_0505364103_6.pdf [file pnas_0505364103_6.pdf]
